# Supplementary material for: HIV-1 virological synapse formation enhances infection spread by dysregulating Aurora Kinase B
Source: PubMed Central journal article supplement (PMC10374047; doi:10.1371/journal.ppat.1011492), 2023-07-17

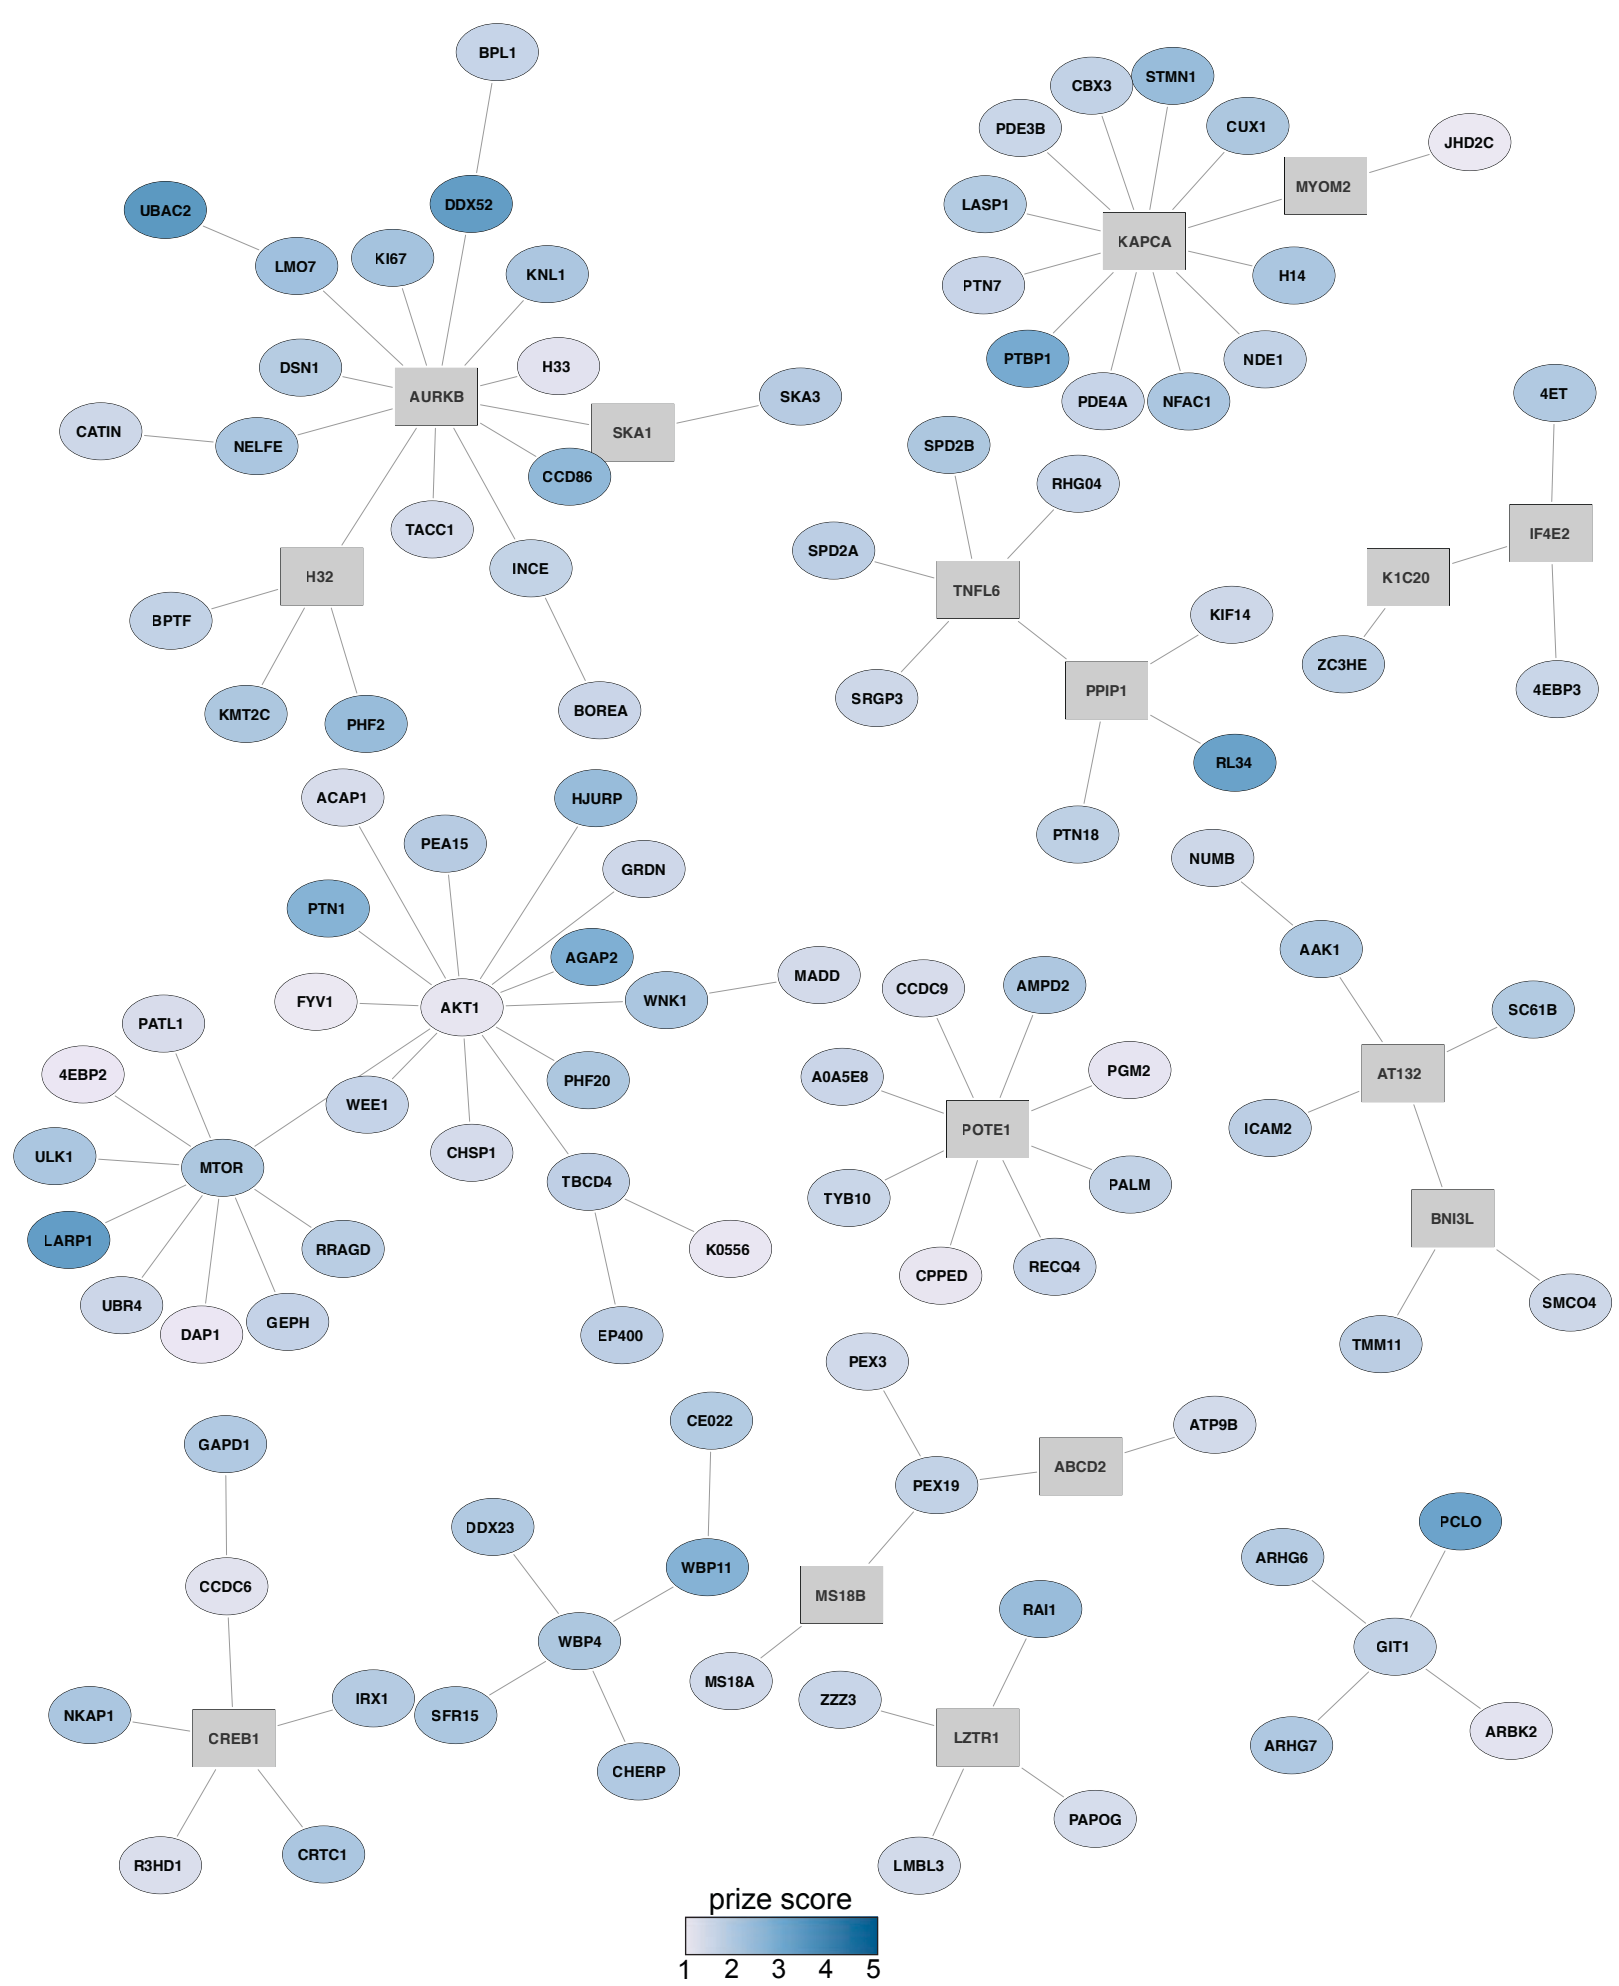

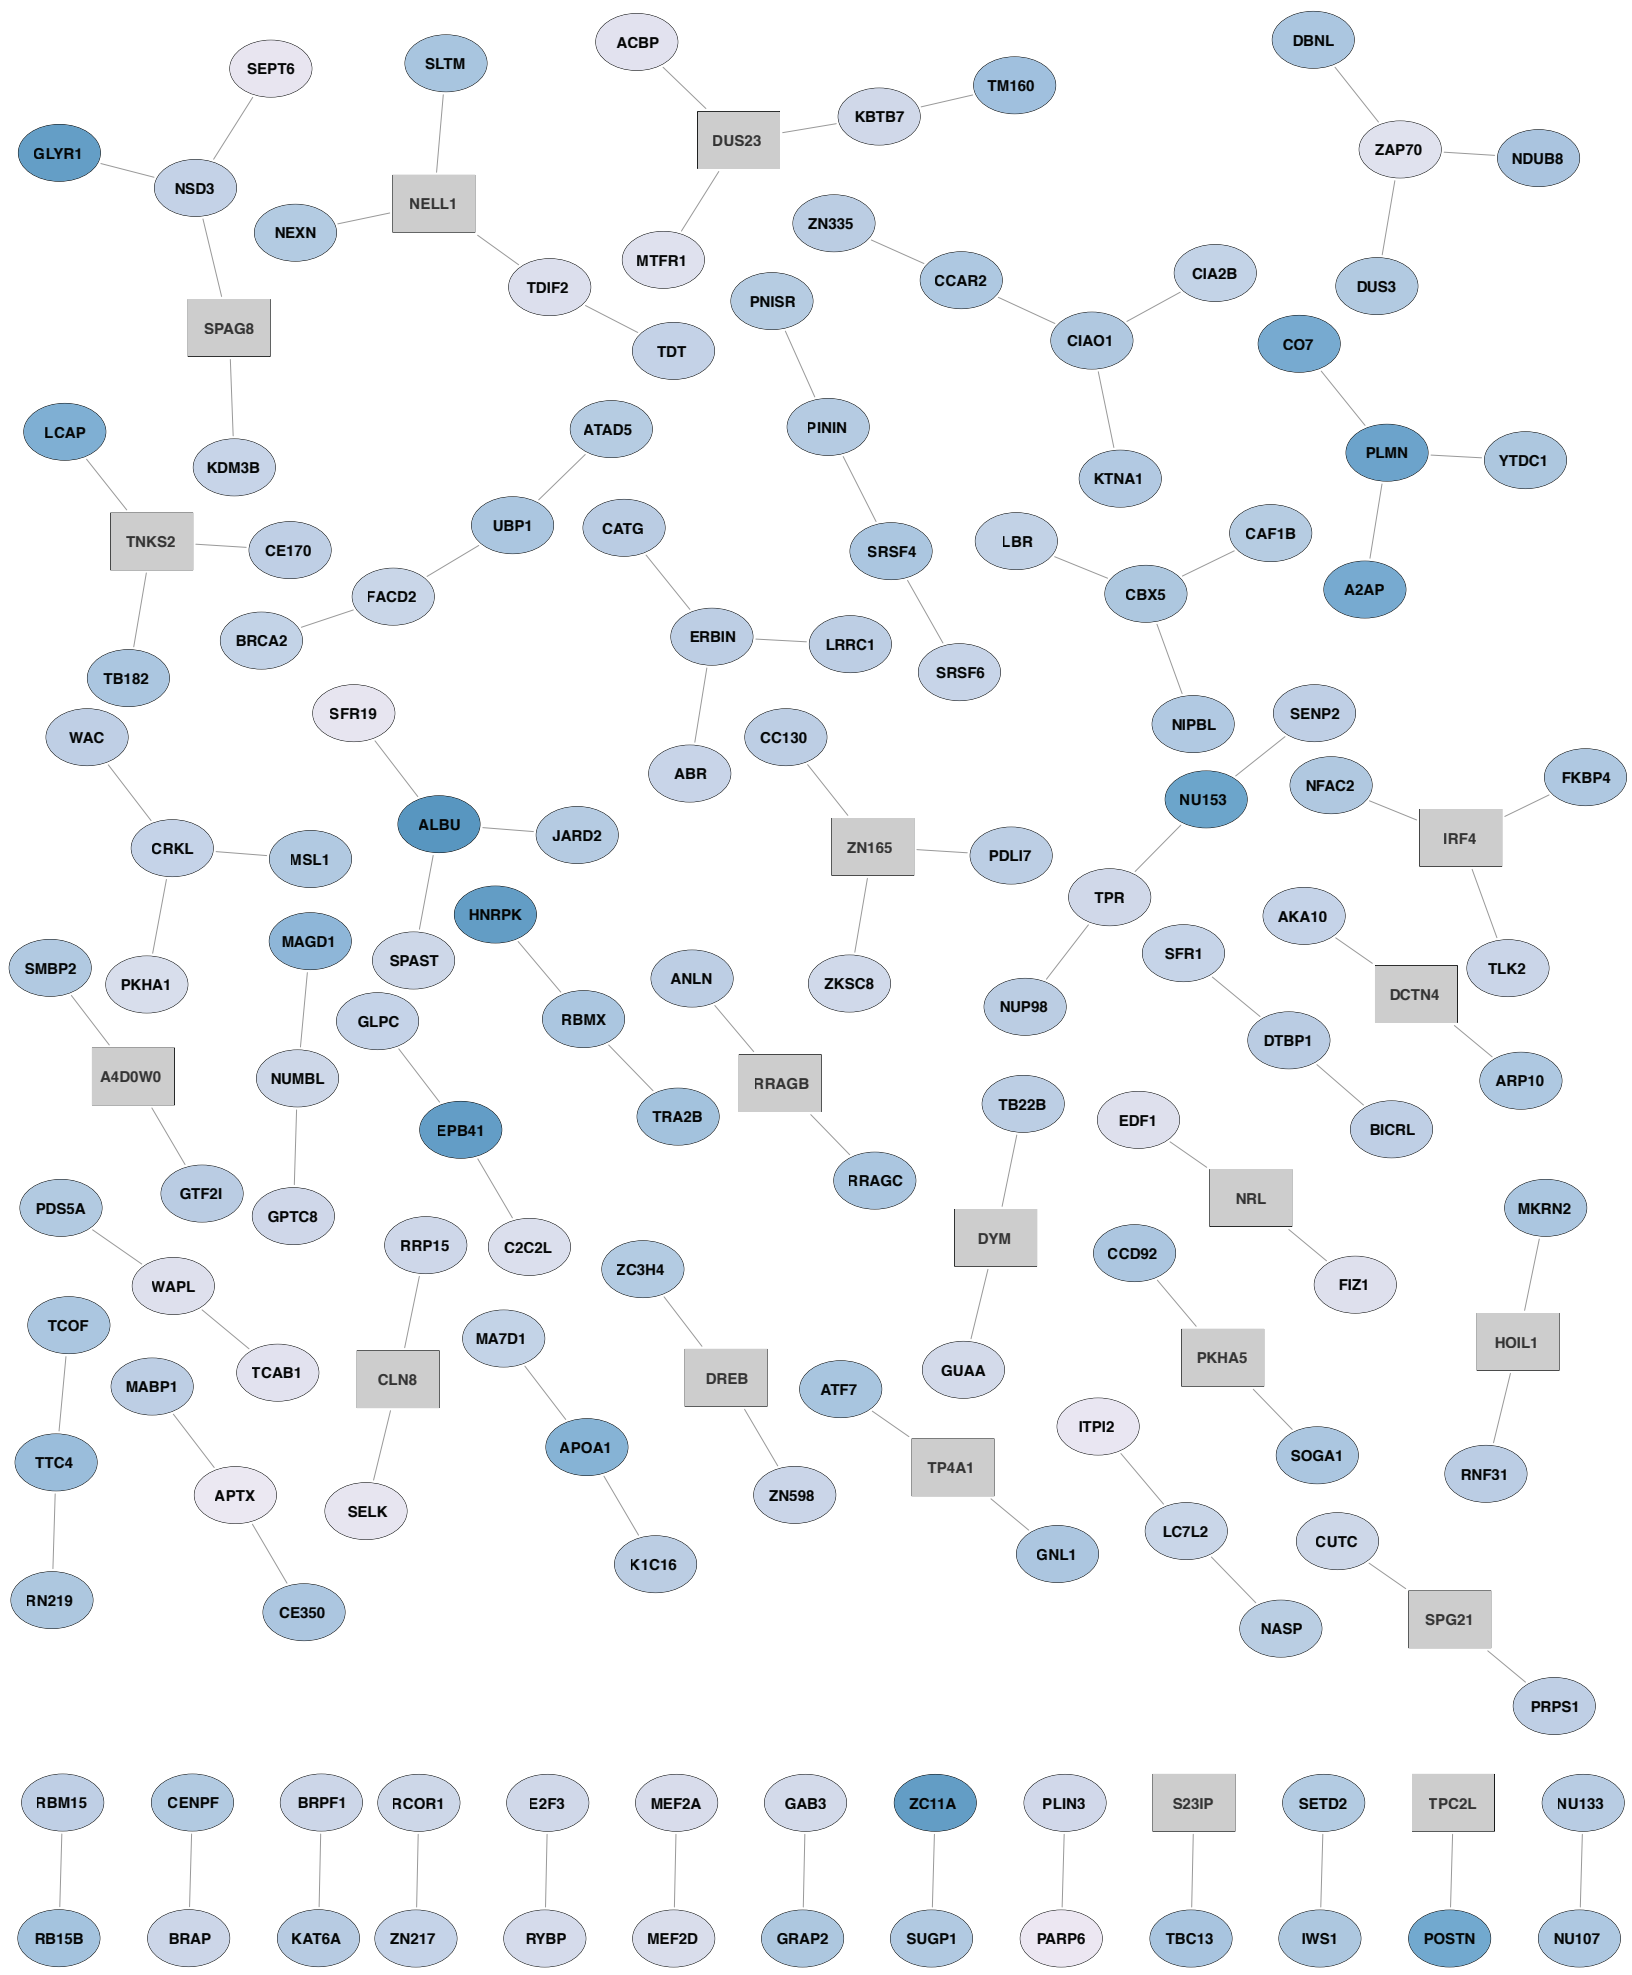

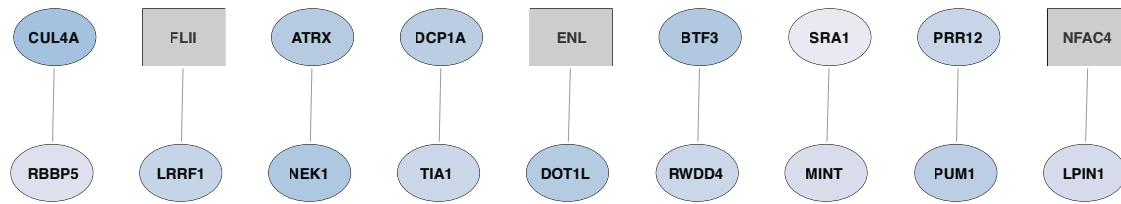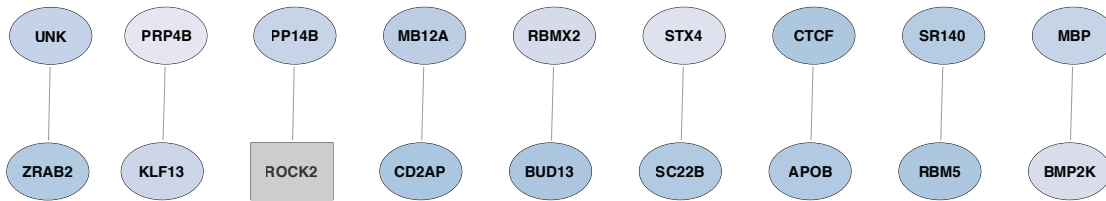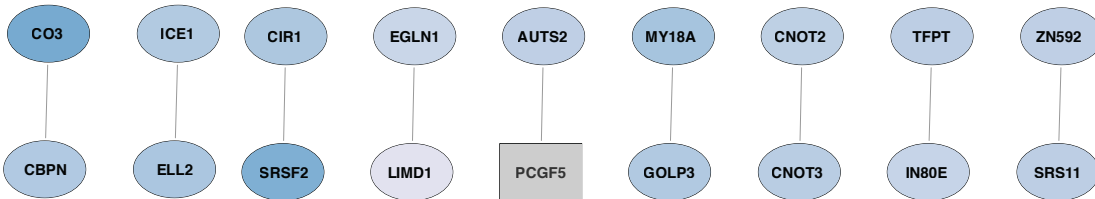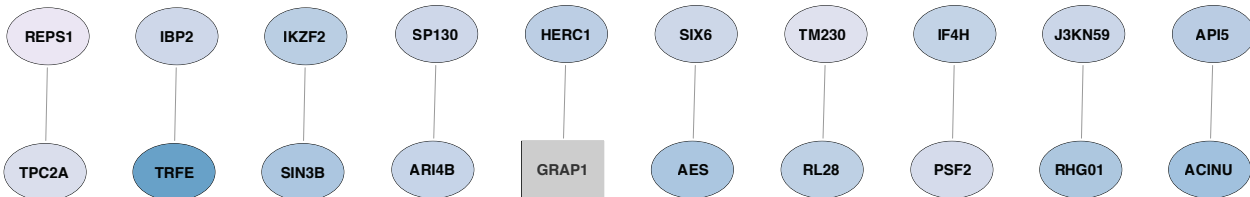

Supplement: ppat.1011492.s004.pdf [file ppat.1011492.s004.pdf]
