# Supplementary material for: HIV-1 virological synapse formation enhances infection spread by dysregulating Aurora Kinase B
Source: PubMed Central journal article supplement (PMC10374047; doi:10.1371/journal.ppat.1011492), 2023-07-17
Supplement: ppat.1011492.s005.pdf [file ppat.1011492.s005.pdf]

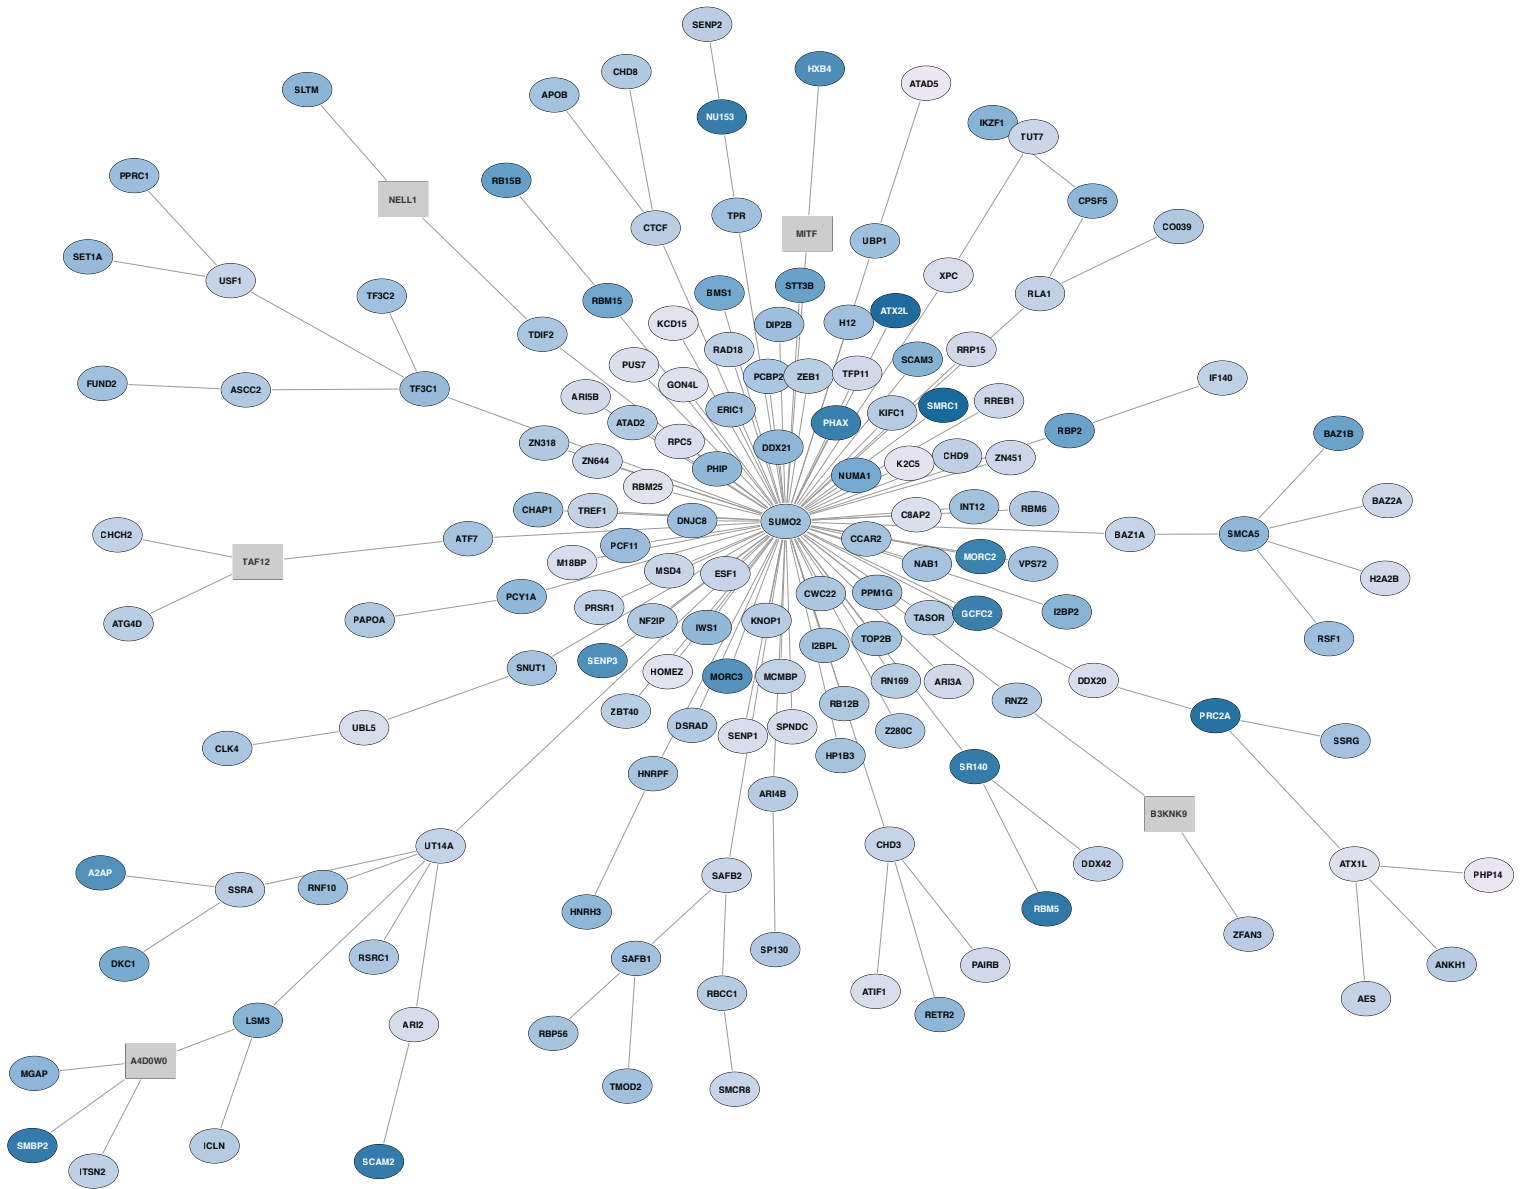

prize score

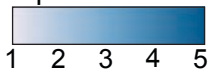

1 2 3 4 5

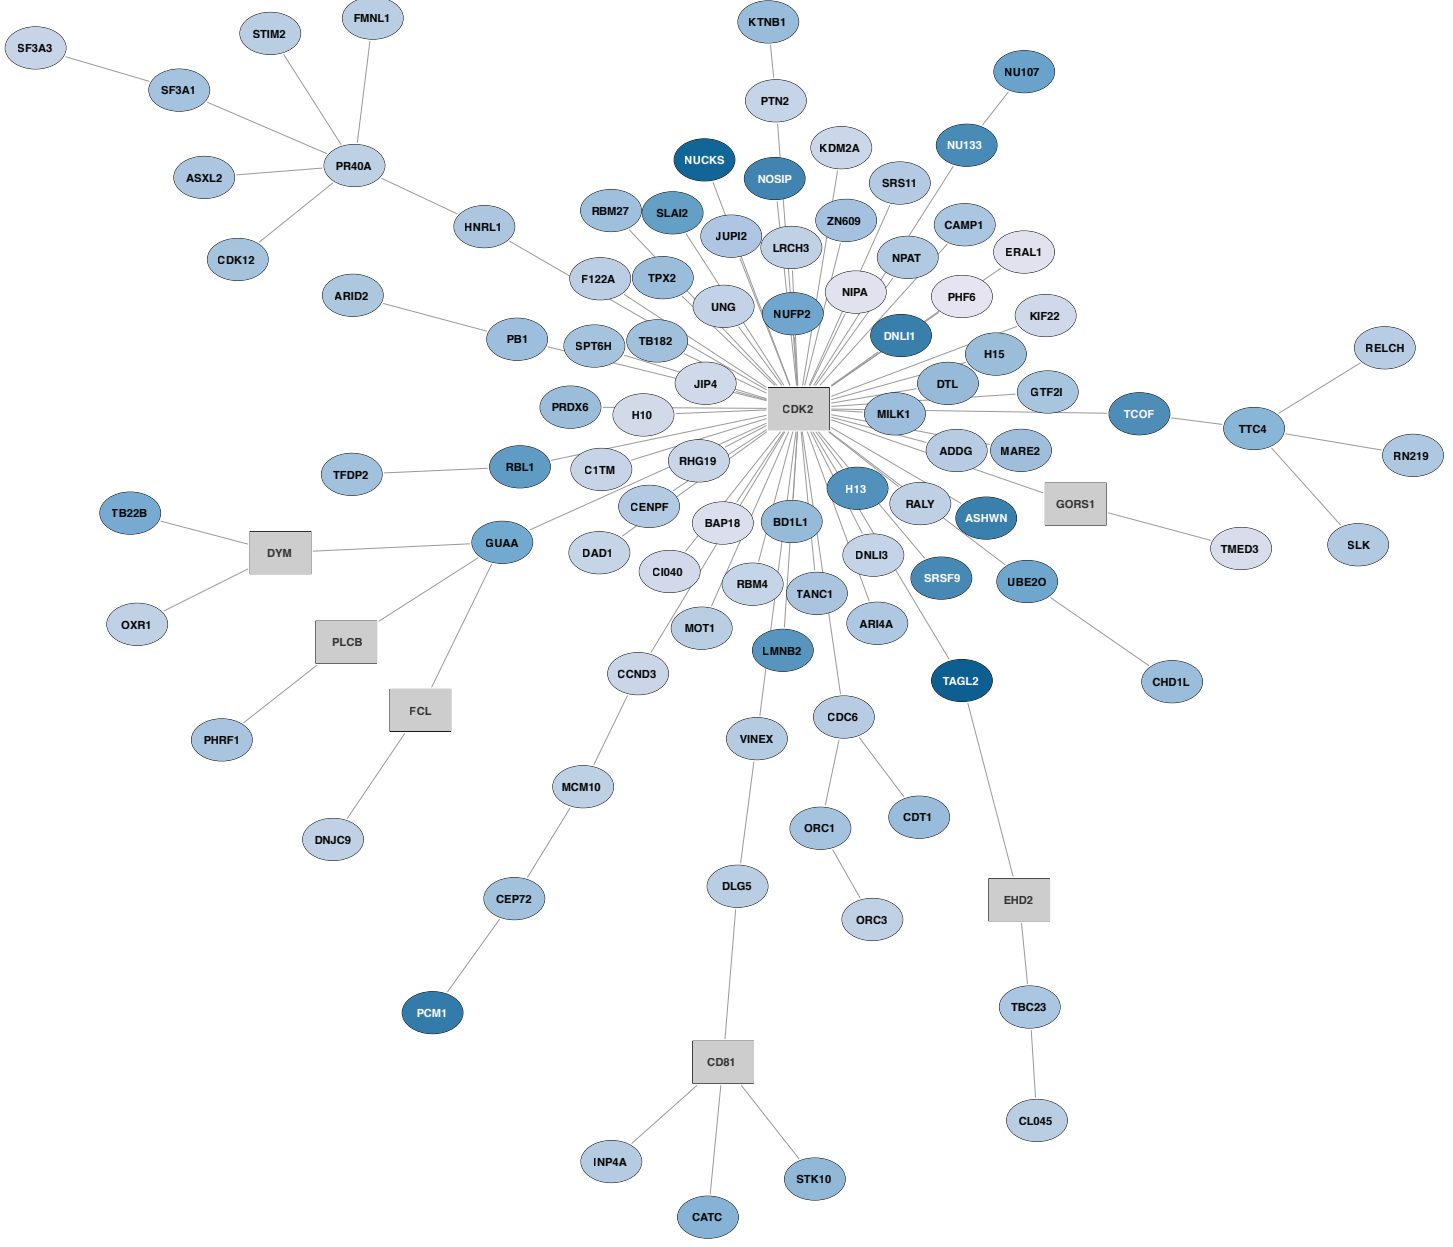

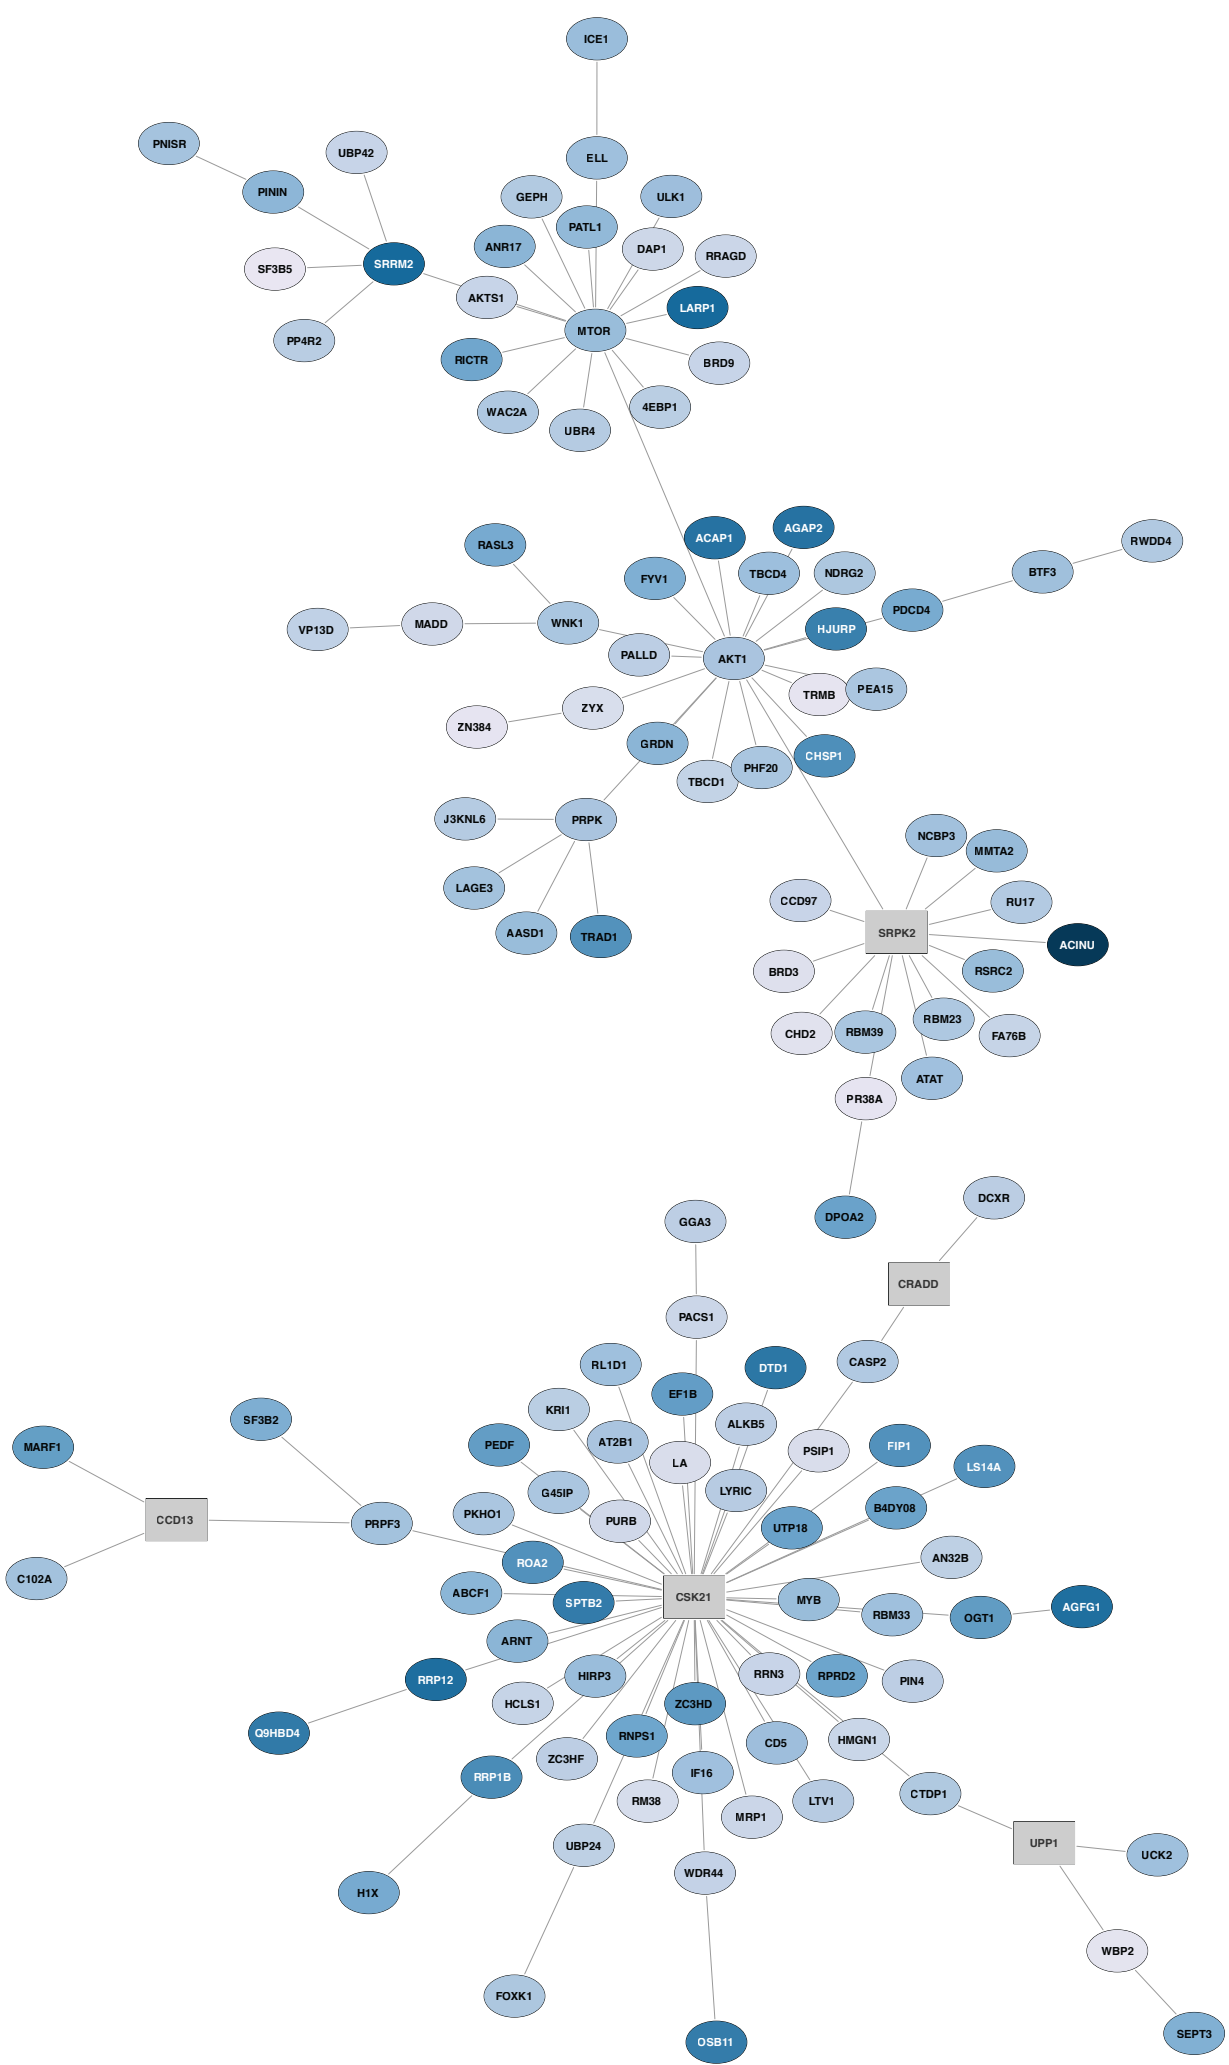

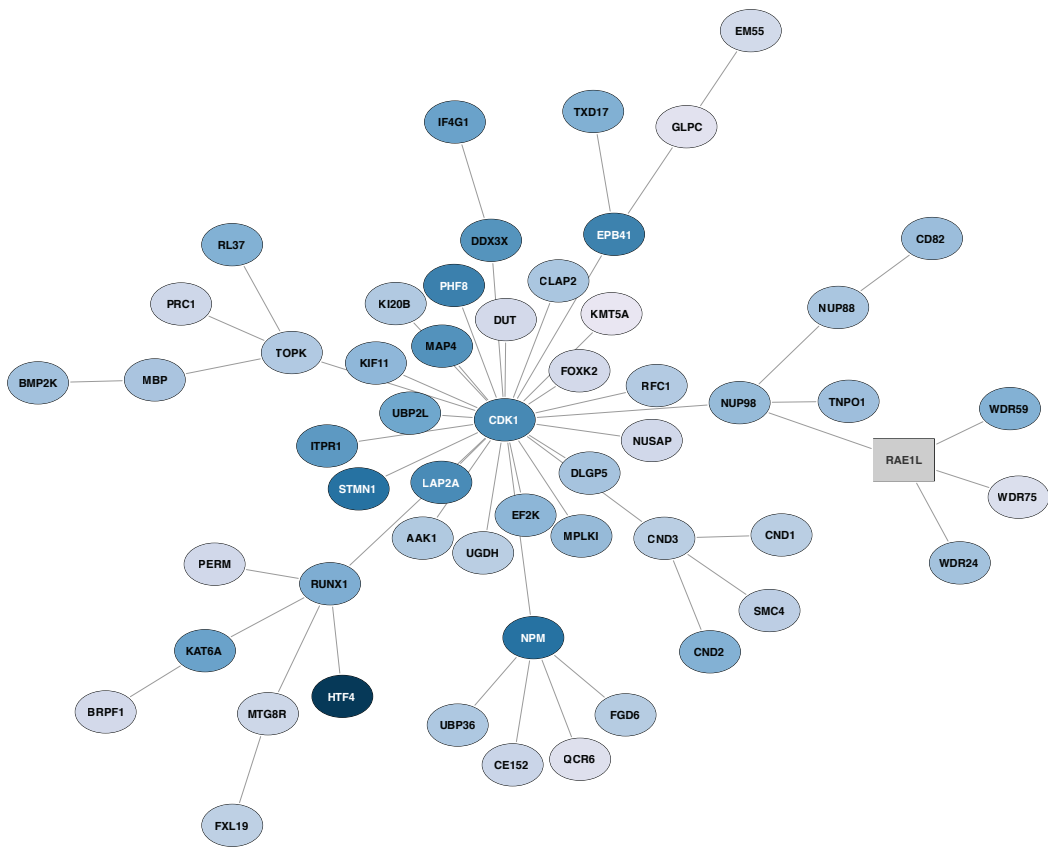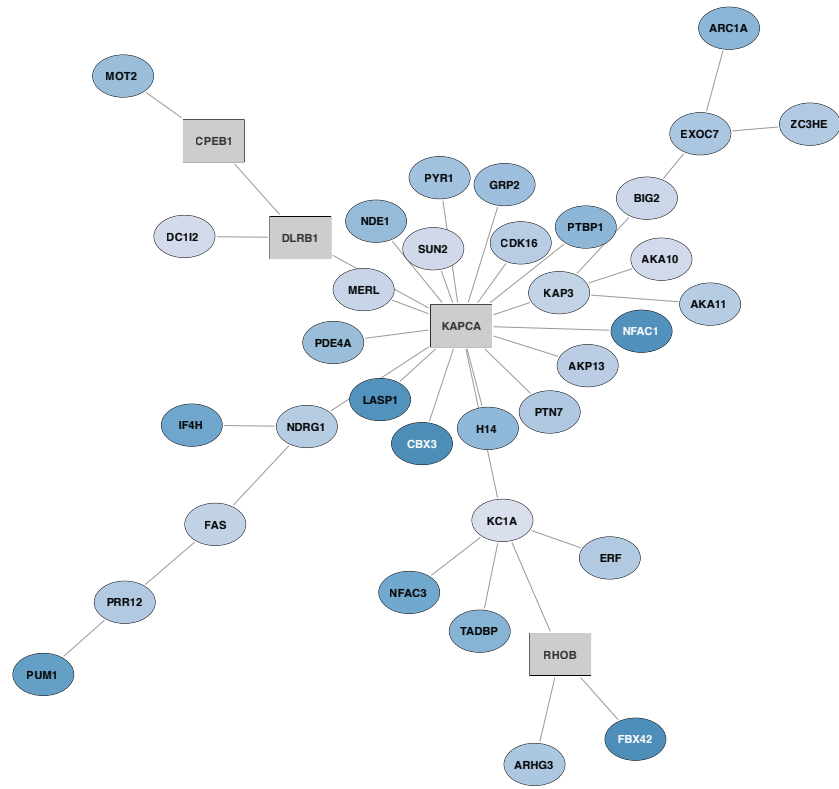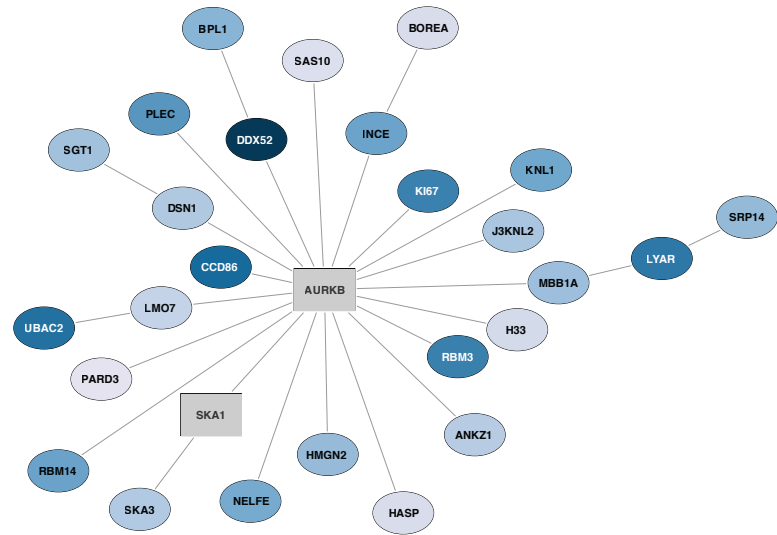

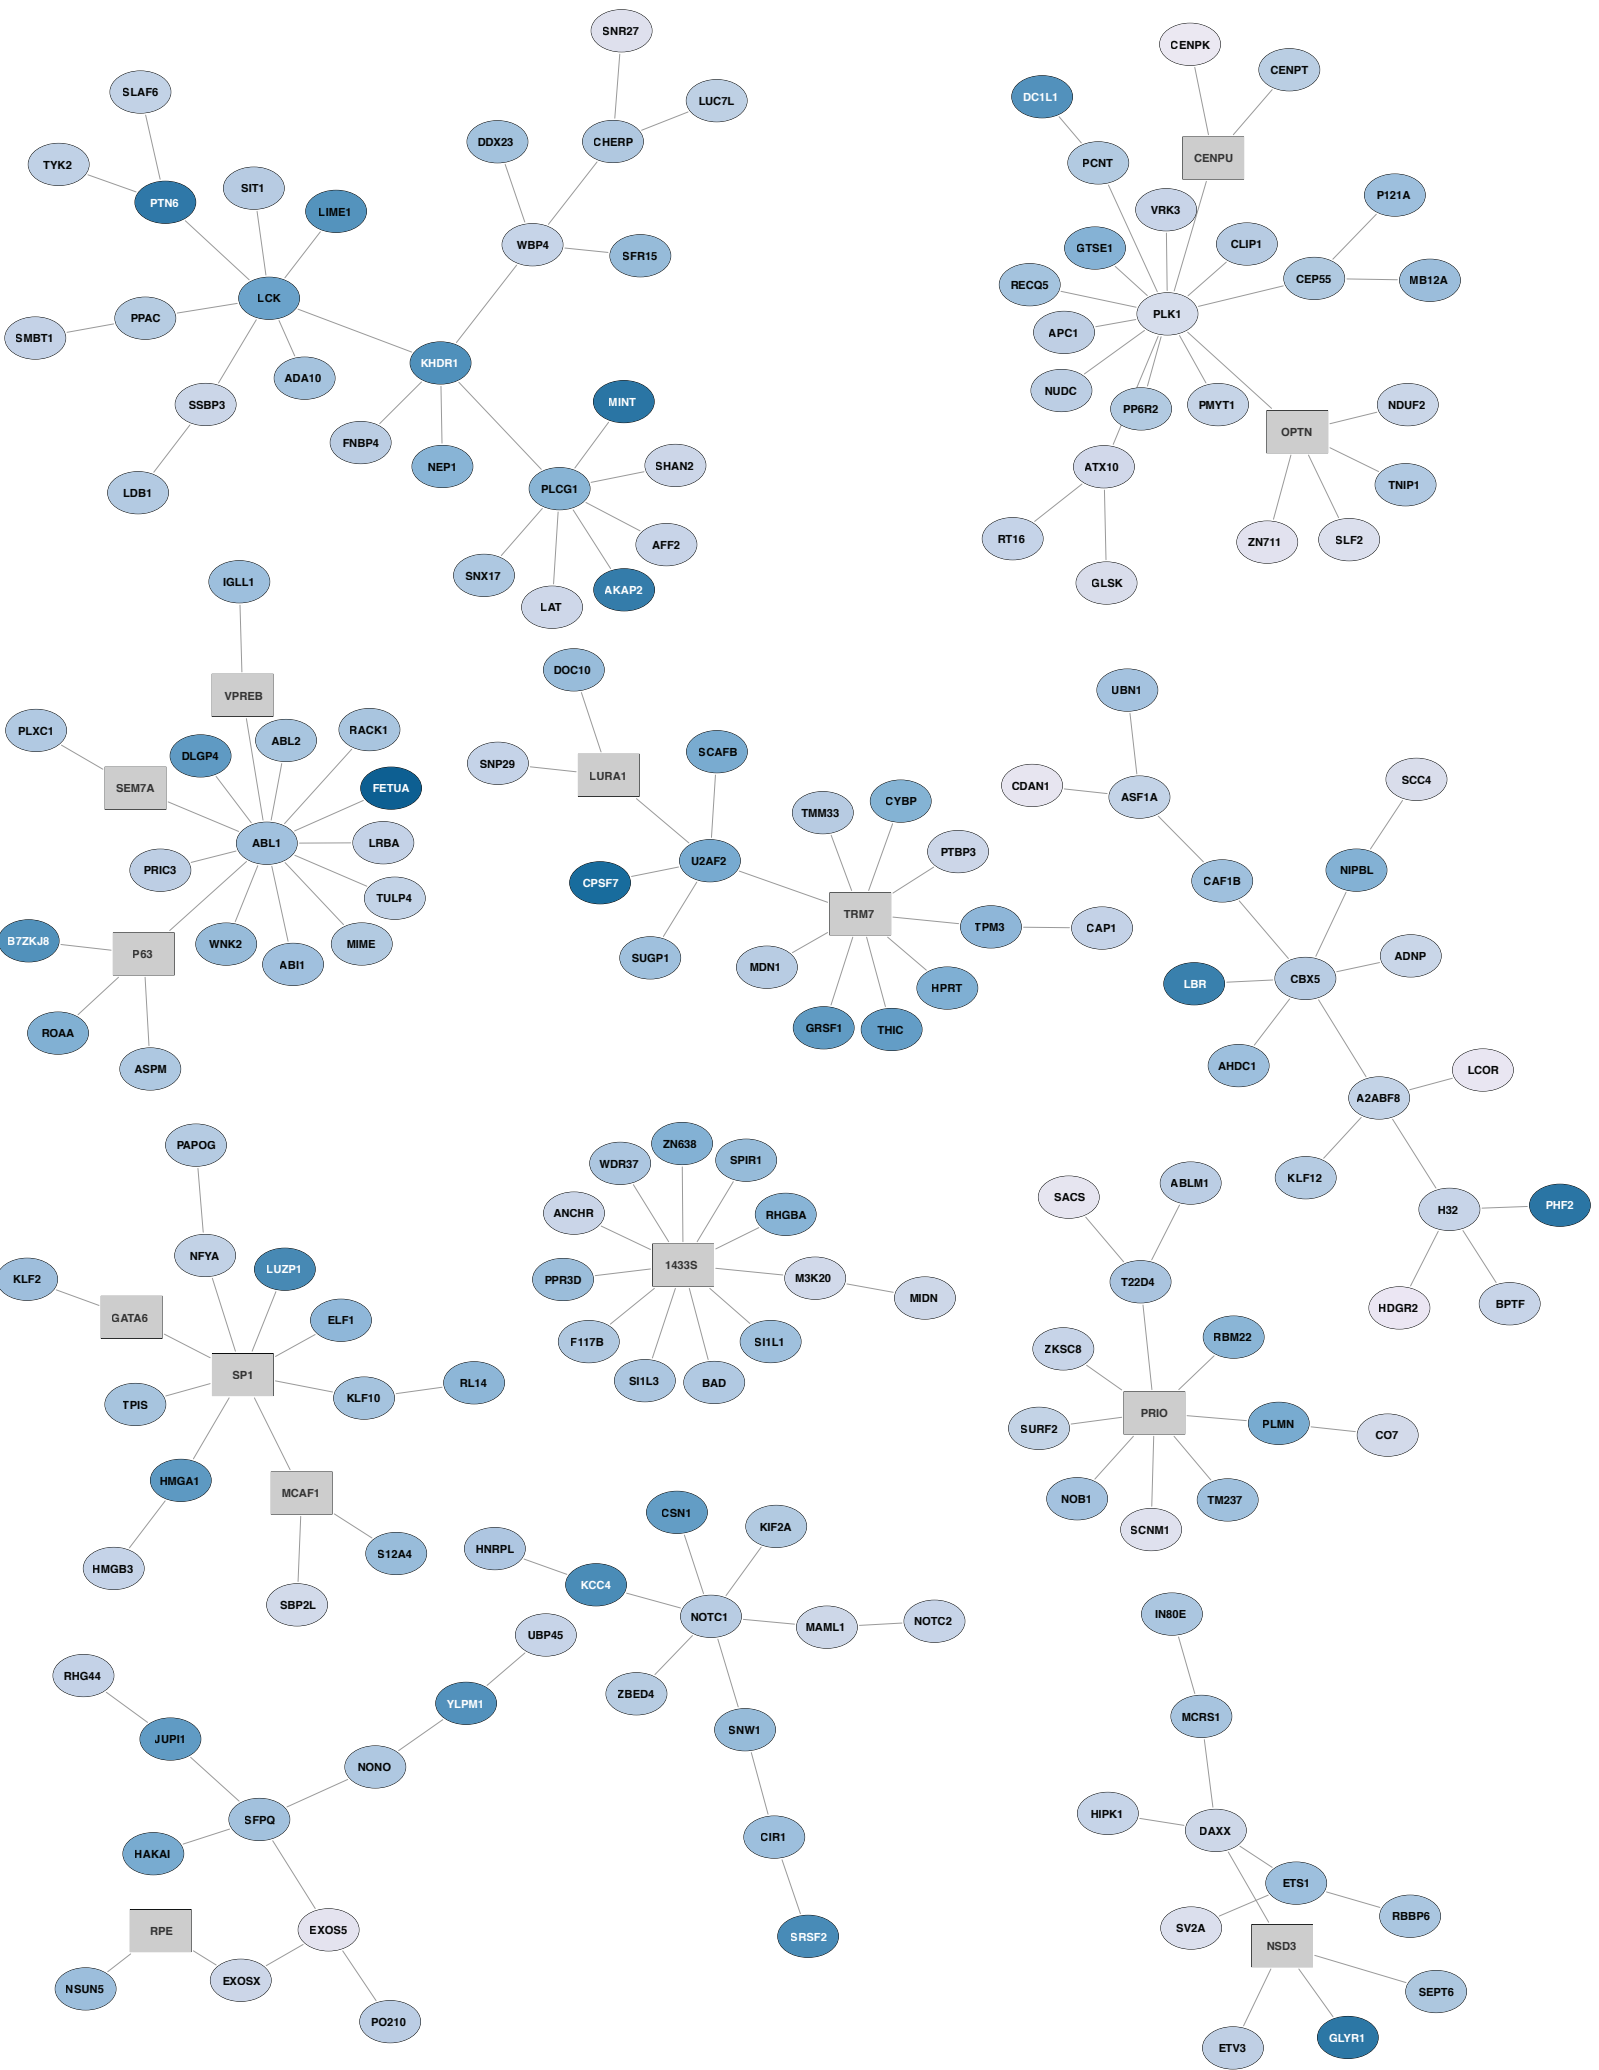

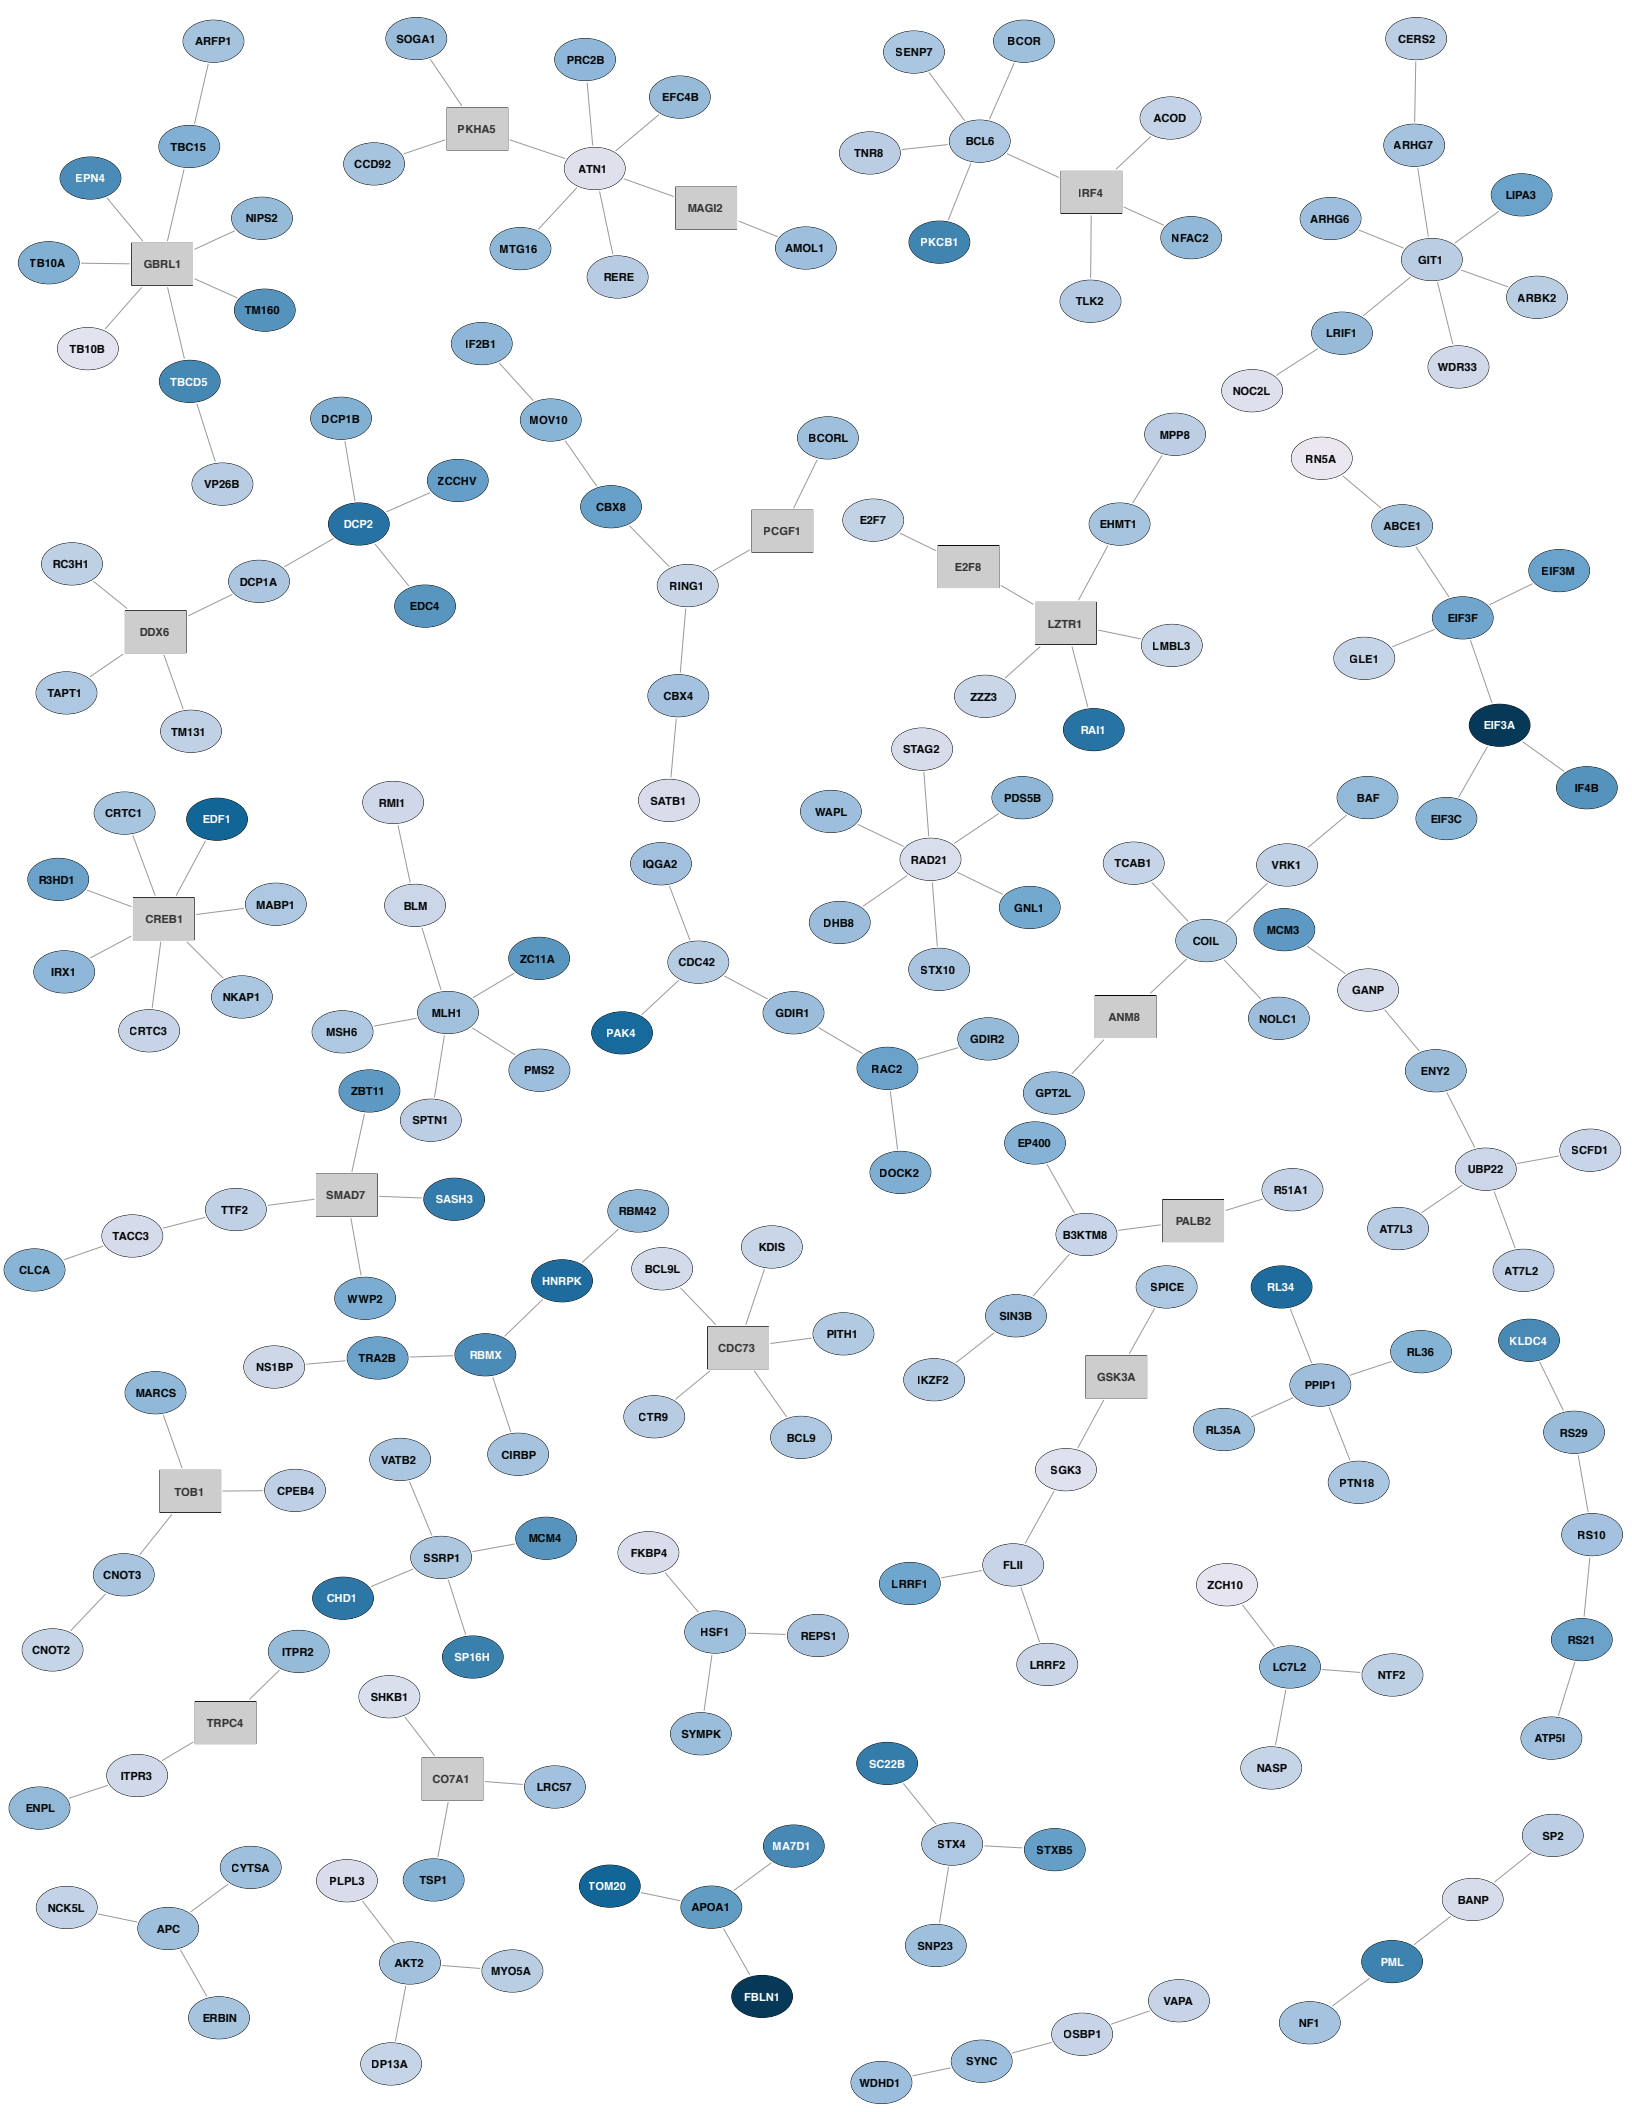

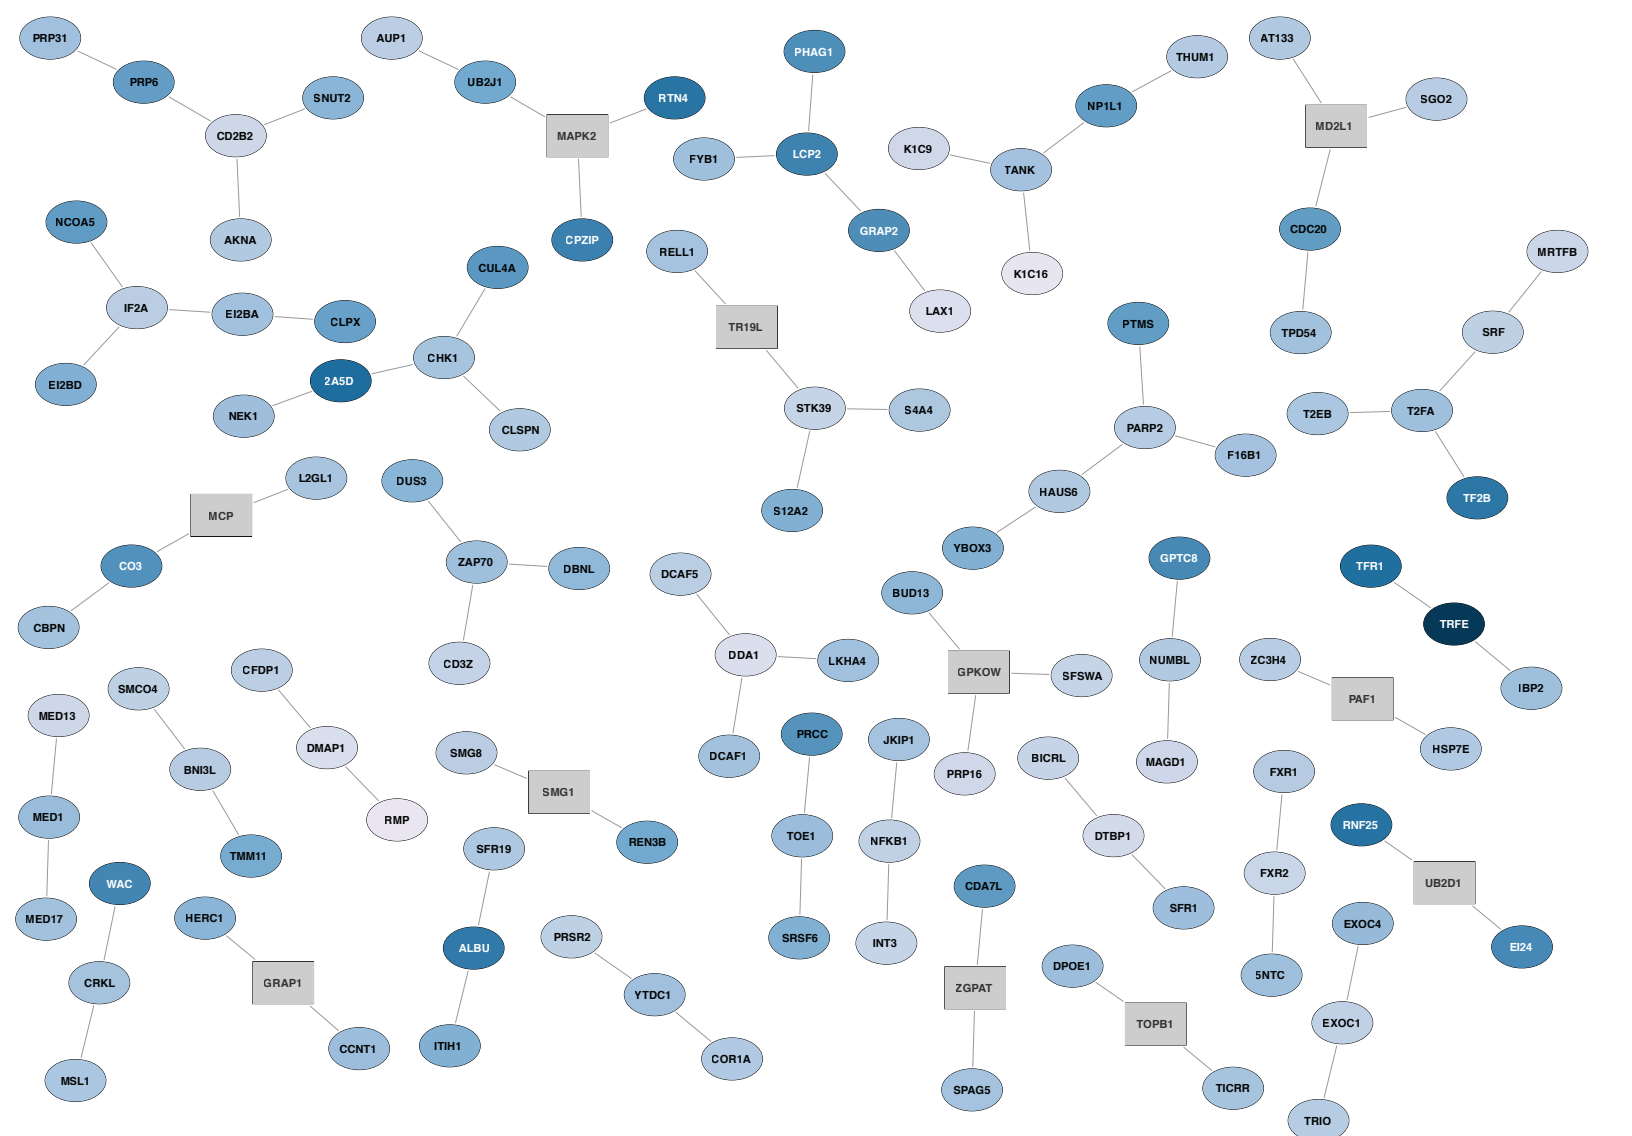

|       |       |        |       |       |       |       |       |       |       |       |       |       |       |       |        |       |
|-------|-------|--------|-------|-------|-------|-------|-------|-------|-------|-------|-------|-------|-------|-------|--------|-------|
| RAB1A | CHM4A | AKAP1  | WBP11 | MTMR5 | K121A | ATPG  | WDR62 | TLS1  | NU205 | PP1R7 | TOM1  | TDIF1 | DNM3B | IRF9  | RAB8A  | TAB3  |
| MTPN  | RANG  | KAPCB  | CE022 | MTMR2 | KANK1 | ITIH2 | RIF1  | LIMD1 | PHB2  | STAU1 | ILVBL | TDT   | DNMT1 | VENTX | BAG6   | M3K7  |
| SCMC1 | WRIP1 | F193B  | GSE1  | BCR   | HERC2 | PHAR4 | SERF2 | SCPDL | TMX1  | SPAS2 | KCID  | LAR1B | IPP2  | SDE2  | DDR GK | MEF2A |
| DAF   | UBP11 | MPIP1  | RCOR3 | RGS12 | RNF8  | ACTB  | VTDB  | NFX1  | TNR6  | RASN  | DVL2  | RPB11 | CPIN1 | MEPCE | UFL1   | MEF2D |
| NCK2  | HINT1 | RB Y1A | ST1E1 | PACN3 | MLF2  | PP2BB | DYRK2 | ABCD2 | SND1  | TGFA1 | APOE  | PGRC1 | ESYT2 | DYR1A | S23IP  | TETN  |
| DOK1  | ARP10 | ZN317  | TBCC  | AB1IP | DNJB6 | TB10C | KTNA1 | ATP9B | G3BP1 | UVRAG | A2MG  | SCAP  | ESYT1 | SF3B1 | TBC13  | TR150 |
| ACPM  | STAT1 | AKP8L  | LAR4B | AK17A | EVL   | PARP6 | FRYL  | THOC5 | POSTN |       |       |       |       |       |        |       |
| ZNH1  | EIF1A | LAP2B  | C1T9A | ZRAB2 | DNMBP | RPR1A | HOME3 | DX39B | TPC2L |       |       |       |       |       |        |       |
